# Supplementary material for: Comparison of Venous Thromboembolism Outcomes after COVID-19 and Influenza Vaccinations
Source: PubMed Central journal article supplement (PMC10695705; doi:10.1055/a-2183-5269), 2023-12-04
Supplement: 10-1055-a-2183-5269-s23080034.pdf [file 10-1055-a-2183-5269-s23080034.pdf]

**Supplementary Table S1** Distribution of comorbidities in Charleston comorbidity index

|                             | COVID-19 vaccinated | Influenza vaccinated | p-Value |
|-----------------------------|---------------------|----------------------|---------|
|                             | <i>n</i> (%)        | <i>n</i> (%)         |         |
| AMI                         | 16,864 (1.85)       | 10,240 (2.31)        | <0.001  |
| Cancer                      | 124,650 (13.68)     | 60,184 (13.60)       | 0.21    |
| Cancer, metastatic          | 16,648 (1.83)       | 11,408 (2.58)        | <0.001  |
| CHF                         | 48,109 (5.28)       | 28,998 (6.55)        | <0.001  |
| CTD                         | 41,400 (4.54)       | 21,249 (4.80)        | <0.001  |
| CVA                         | 35,655 (3.91)       | 22,161 (5.01)        | <0.001  |
| Dementia                    | 23,061 (2.53)       | 13,003 (2.94)        | <0.001  |
| Diabetes                    | 111,154 (12.20)     | 67,281 (15.20)       | <0.001  |
| Diabetes with complications | 38,430 (4.22)       | 25,690 (5.80)        | <0.001  |
| HIV                         | 25,842 (2.84)       | 12,995 (2.94)        | 0.001   |
| Liver                       | 61,143 (6.71)       | 32,163 (7.27)        | <0.001  |
| Liver, severe               | 7,486 (0.82)        | 4,166 (0.94)         | <0.001  |
| Hemiplegia                  | 6,631 (0.73)        | 4,050 (0.92)         | <0.001  |
| PUD                         | 17,215 (1.89)       | 9,693 (2.19)         | <0.001  |
| Pulmonary disease           | 139,473 (15.30)     | 86,933 (19.64)       | <0.001  |
| Peripheral vascular disease | 42,231 (4.63)       | 25,268 (5.71)        | <0.001  |
| Renal                       | 77,757 (8.53)       | 46,514 (10.51)       | <0.001  |

Abbreviations: AMI, acute myocardial infarction; CHF, congestive heart failure; CTD, connective tissue disease; CVA, cerebrovascular accident; HIV, human immunodeficiency virus; PUD, peptic ulcer disease.
